# Supplementary material for: Overexpression of miR-4433 by suberoylanilide hydroxamic acid suppresses growth of CML cells and induces apoptosis through targeting Bcr-Abl
Source: PubMed Central journal article supplement (PMC6843884; doi:10.7150/jca.34972), 2019-09-07
Supplement: jcav10p5671s1.pdf [file jcav10p5671s1.pdf]

**Table S1.** Oligonucleotide sequences for PCR and overexpression of miR-4433

| No. | nucleotide sequences                                                        | F/R |
|-----|-----------------------------------------------------------------------------|-----|
| 1   | 5' CCCTCGAGCTGTCCACATCCCCAGAGCC 3'                                          | F   |
| 2   | 5' ATTTGCGGCCGCCCTAACCCCTCCCTGATGACCC 3'                                    | R   |
| 3   | 5' AGAGCACTTCATCACTCGAAGGCCCTTTCAGGGCAC 3'                                  | Rm  |
| 4   | 5' CTTCGAGTGATGAAGTGCTCTAGACAAAGTAGATTCTTAC 3'                              | Fm  |
| 5   | 5' CCCTCGAGCTGTCCACATCCC 3'                                                 | F   |
| 6   | 5' ATTTGCGGCCGCCCTAACCCTC 3'                                                | R   |
| 7   | 5'GATCCATGTCCCACCCCCACTCCTGTCTTCCTGTCAGAACAG<br>GAGTGGGGGTGGGACATTTTTTTG 3' | F   |
| 8   | 5'AATTCAAAAAATGTCCCACCCCCACTCCTGTTCTGACAGGAA<br>GACAGGAGTGGGGGTGGGACATG 3'  | R   |

1 and 2, primers for amplification of ABL1 3'UTR containing the miR-4433 targeted sequences; 3,4,5 and 6, primers for overlap-extension PCR to mutate the miR-4433 targeted sequences on ABL1 3'UTR; 7 and 8, oligonucleotide sequences for construction of miR-4433 overexpression plasmid; F, forward; R, reverse; m, mutation.
